# Supplementary material
Source: PubMed Central journal article supplement (PMC3640364)
Supplement: NIHMS453571-supplement-Supplementary_Data.pdf [file NIHMS453571-supplement-Supplementary_Data.pdf]

Haematopoietic cells produce BDNF and regulate appetite  
upon migration to the hypothalamus

Hiroshi Urabe, Hideto Kojima, Lawrence Chan, Tomoya Terashima, Nobuhiro Ogawa, Miwako Katagi, Kazunori Fujino, Asako Kumagai, Hiromichi Kawai, Akihiro Asakawa, Akio Inui, Hitoshi Yasuda, Yutaka Eguchi, Kazuhiro Oka, Hiroshi Maegawa, Atsunori Kashiwagi, Hiroshi Kimura

## Supplementary figures

### Supplementary Fig. S1. Cytokine expression of bone marrow-derived cells.

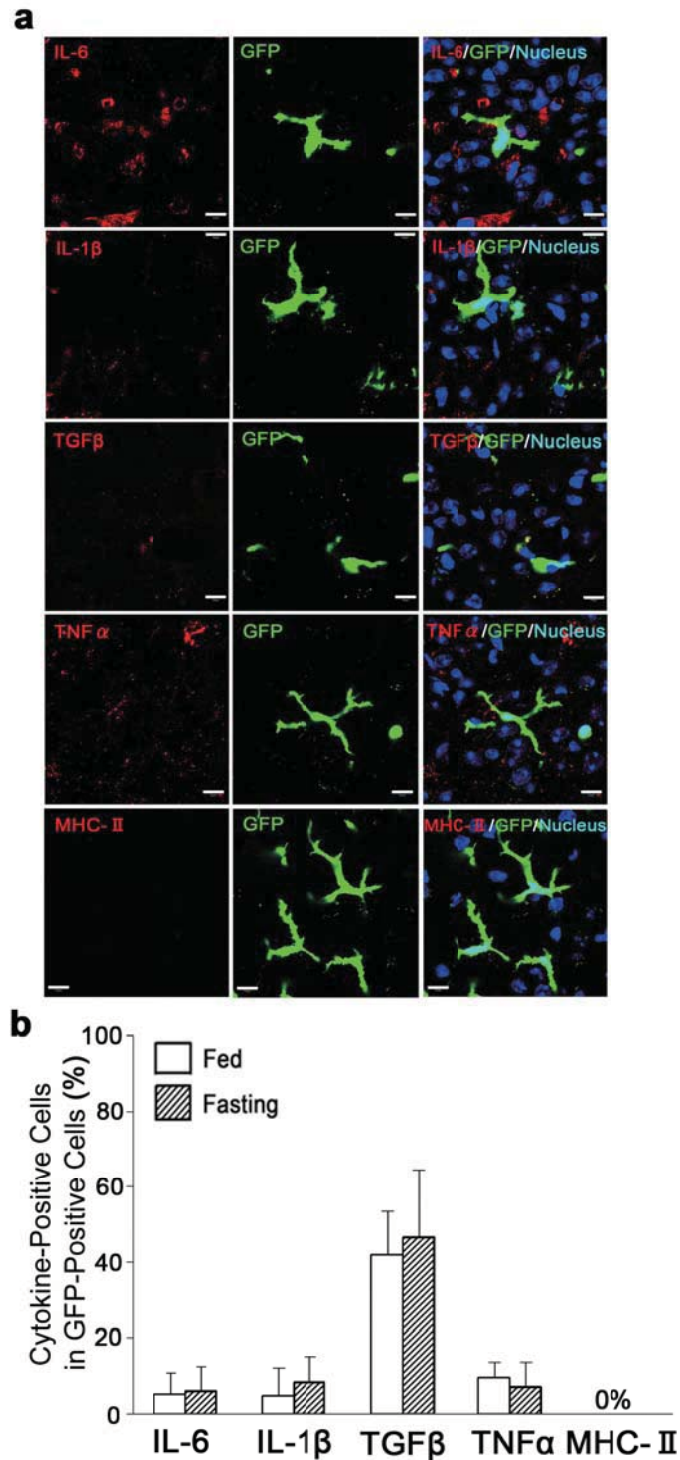

**a**, Co-localization analysis of GFP-positive cells and immunostaining of cytokines (IL-6, IL-1 $\beta$ , TGF $\beta$ , TNF $\alpha$  and MHC-II) in the PVN from BM-chimeric mice. Scale bars = 10  $\mu$ m. Red: IL-6, IL-1 $\beta$ , TGF $\beta$ , TNF $\alpha$ , and MHC-II, green: GFP, blue: Nucleus. **b**, The percentage of cytokine-positive cells within the population of GFP-positive BMDCs in the PVN of fed or fasting (16h) BM-chimeric mice (n=3-5 in each group). Results are presented as means  $\pm$  SD. IL-6: interleukin-6, IL-1 $\beta$ : interleukin-1 $\beta$ , TGF $\beta$ : transforming growth factor  $\beta$ , TNF $\alpha$ : tumour necrosis factor  $\alpha$ , MHC-II: major histocompatibility complex-II.

**Supplementary Fig. S2. Laser capture microdissection (LCM) and immunohistochemistry for the determination of microglial BDNF production.**

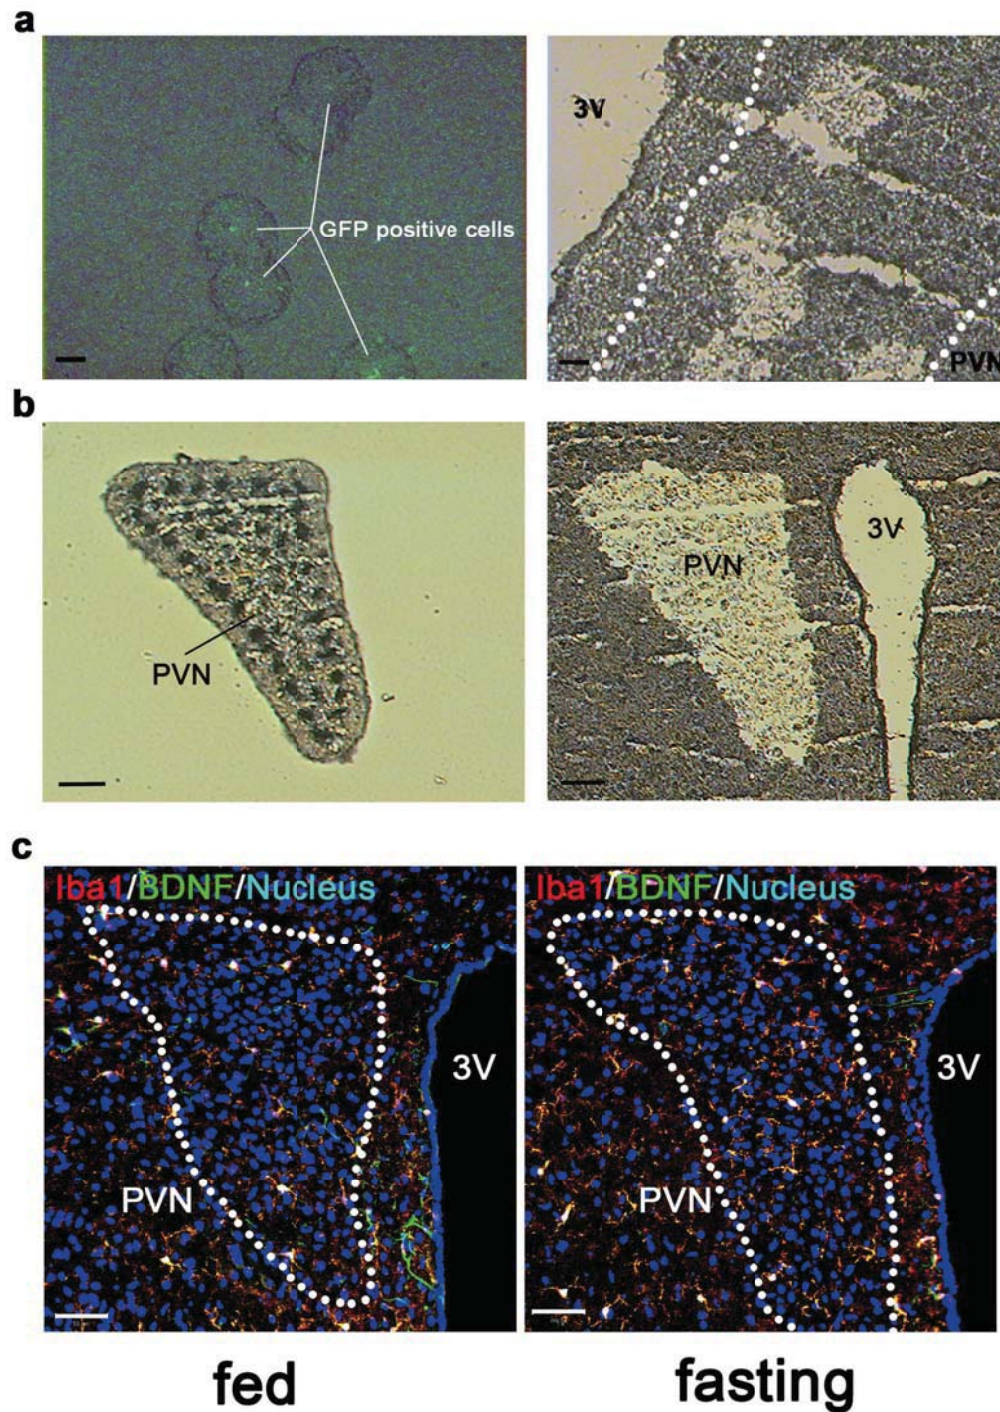

**a**, Fluorescence and light microscopy of GFP-positive cells in the PVN captured by LCM. Left panel shows captured GFP-positive cells under fluorescence microscopy and right panel shows residual PVN after capture of GFP-positive cells under light microscopy. Dotted lines delineate the PVN. Scale bars = 10  $\mu\text{m}$ . **b**, Light microscopy of PVN captured by LCM. Left panel shows the captured PVN and the right panel shows the residual hypothalamic region after capture of the PVN. Scale bars = 50  $\mu\text{m}$ . 3V: 3rd ventricle. **c**, Immunostaining of Iba1 and BDNF in the PVN from fed or fasting (16h) C57BL/6J mice. Red: Iba1, green: BDNF, blue: Nucleus. Scale bars = 50  $\mu\text{m}$ . Iba1: ionized calcium binding adaptor molecule 1.



Supplementary Fig. S3. Contact of BMDCs with neurons.

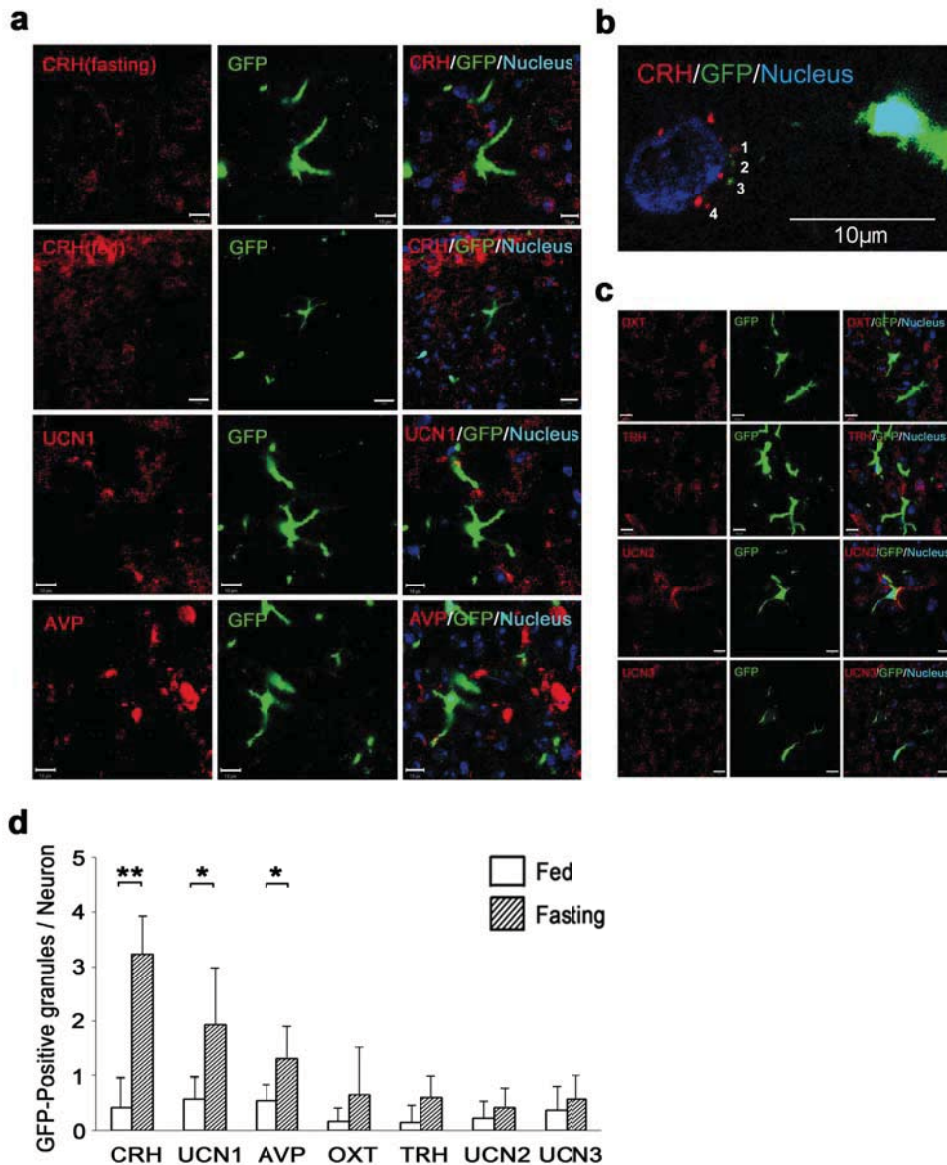

**a**, Localization of GFP-positive cells and neurons positive for CRH, UCN1 or AVP within the PVN of GFP-BM chimeric mice. Red: immunostaining for CRH, UCN1, or AVP, green: GFP, blue: Nucleus. Scale bars = 10  $\mu$ m. Fasting: fasting for 16 hours. **b**, Enlarged figure of CRH-positive neuron. Number showed the count of GFP-positive granules (dots) in single CRH-positive neuron. Scale bars = 10  $\mu$ m. **c**, Localization of GFP-positive cells and neurons positive for OXT, TRH, UCN2 and UCN3 within the PVN of GFP-BM chimeric mice. Red: Immunostaining of OXT, TRH, UCN2 or UCN3, green: GFP, blue: Nucleus. Scale bars = 10  $\mu$ m. **d**, The average number of GFP-positive granules associated with each neuropeptide-positive neuron within the PVN of fed and fasting (16h) mice (n=5-6 in each group, \*P<0.05). Results are presented as means  $\pm$  SD. The average number of GFP-positive granules on one neuron positive for CRH, UCN1, AVP, OXT, TRH, UCN2 or UCN3. The numbers of granules associated with CRH, UCN1 and AVP neurons were increased by fasting as shown in **a**, whereas those associated with the other markers were not, as shown in **b**. CRH: corticotropin-releasing hormone, UCN: urocortin, AVP: arginine vasopressin, OXT: oxytocin, TRH: thyrotropin releasing hormone.

**Supplementary Fig. S4. Effect of BMT on the contact between BMDCs and neurons in the PVN of BM-BDNF<sup>-/-</sup> mice.**

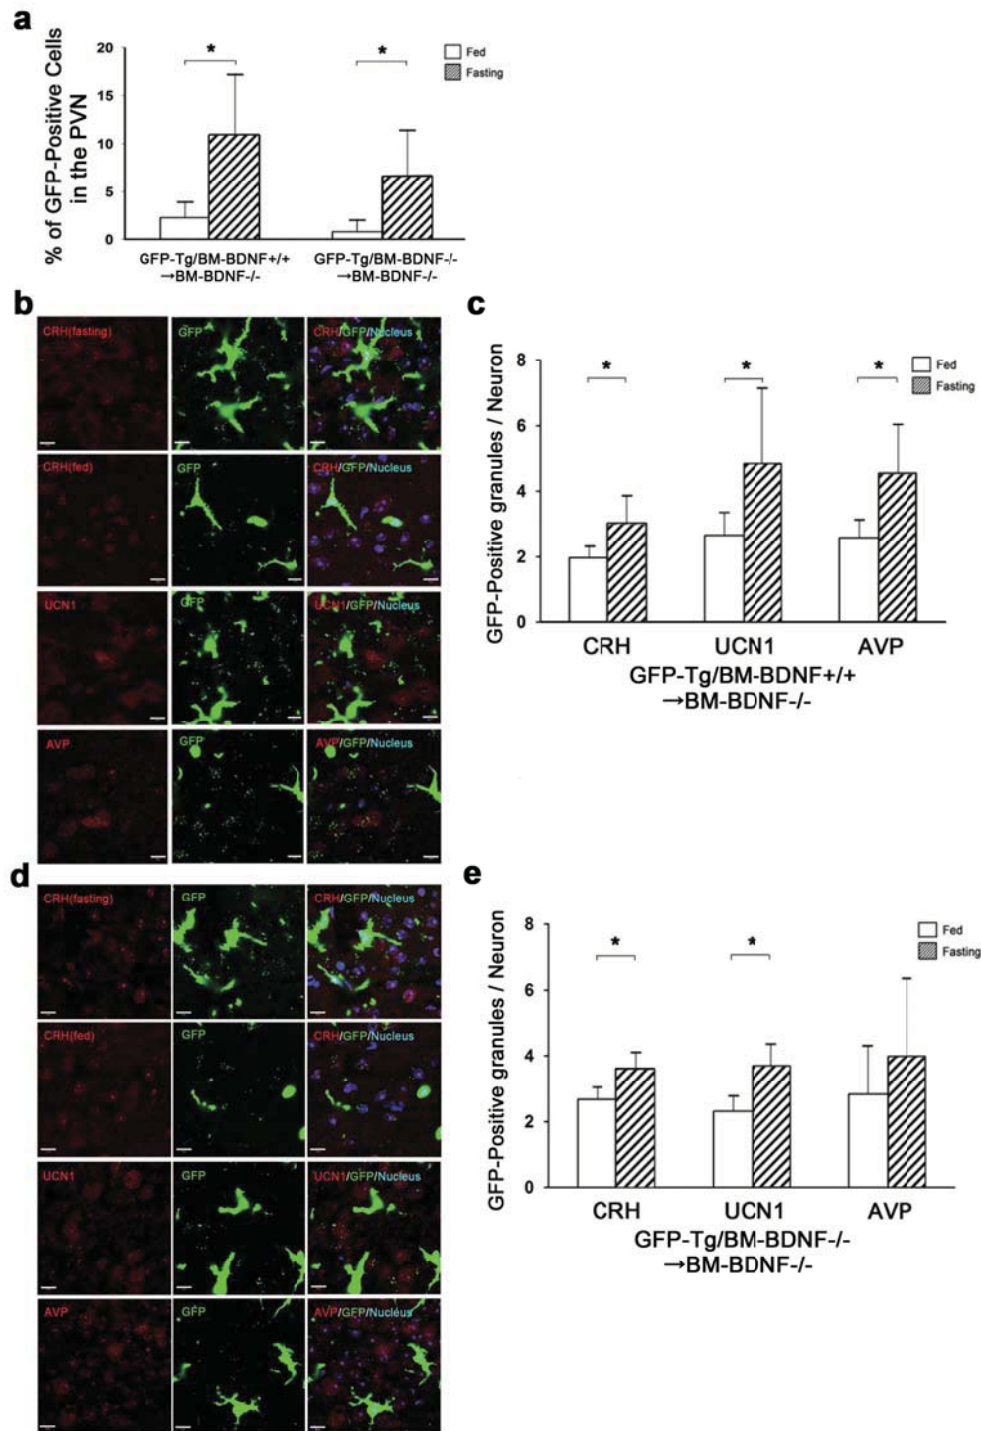

**a**, The number of GFP-positive cells in BM-BDNF<sup>-/-</sup> mice that received BMT from GFP-TG/BM-BDNF<sup>+/+</sup> or GFP-TG/BM-BDNF<sup>-/-</sup> mice (n=6-7 in each group). **b** and **c**, Analysis of GFP-positive granules in samples stained for various peptides: CRH in fed or fasting, UCN1 in fasting, and AVP in fasting in the mice with BMT from GFP-TG/BM-BDNF<sup>+/+</sup>. **d** and **e**, Analysis of GFP-positive granules in samples stained for various peptides similar to **b** in the mice with BMT from GFP-TG/BM-BDNF<sup>-/-</sup> mice. Scale bars = 10  $\mu$ m in **b** and **d**. All data represent the means  $\pm$  S.D. \*P<0.05. CRH: corticotropin-releasing hormone, UCN: urocortin, AVP: arginine vasopressin.

**Supplementary Table S1. The expression of microglia-related genes (LCM of GFP-positive cells).**

| r      | Symbol   | Description                                                           | Genbank No. |
|--------|----------|-----------------------------------------------------------------------|-------------|
| 4.9889 | Cxcl1    | chemokine (C-X-C motif) ligand 1                                      | BB554288    |
| 4.5911 | Cd47     | CD47 antigen                                                          | BM942688    |
| 4.2652 | Prkcd    | protein kinase C, delta                                               | AF251036    |
| 4.2469 | Prkcd    | protein kinase C, delta                                               | BB541041    |
| 4.1481 | Cd163    | CD163 antigen                                                         | NM_053094   |
| 4.0033 | Cd1d1    | CD1d1 antigen                                                         | NM_007639   |
| 3.6197 | Hr       | hairless                                                              | AV231755    |
| 3.3931 | Agtr1a   | angiotensin II receptor, type 1a                                      | AI551199    |
| 3.3071 | Mef2d    | Myocyte enhancer factor 2D                                            | AW912756    |
| 3.0660 | Myoc     | myocilin                                                              | AW125804    |
| 2.9207 | Bid      | BH3 interacting domain death agonist                                  | NM_007544   |
| 2.7819 | Itns1    | Intersectin 1 (SH3 domain protein 1A)                                 | AW125345    |
| 2.7036 | Cdkn1a   | cyclin-dependent kinase inhibitor 1A (P21)                            | AK007630    |
| 2.6790 | Cnbp     | cellular nucleic acid binding protein                                 | BM237919    |
| 2.6364 | Calcr    | calcitonin receptor                                                   | NM_007588   |
| 2.5439 | Fgfr2    | fibroblast growth factor receptor 2                                   | NM_010207   |
| 2.5250 | Ucp2     | uncoupling protein 2 (mitochondrial, proton carrier)                  | AW108044    |
| 2.5205 | Tanc2    | Tetratricopeptide repeat, ankyrin repeat and coiled-coil containing 2 | BB345595    |
| 2.5047 | Sirpa    | signal-regulatory protein alpha                                       | AB018194    |
| 2.4705 | Prkcc    | protein kinase C, gamma                                               | BM215011    |
| 2.4561 | Chrna4   | cholinergic receptor, nicotinic, alpha polypeptide 4                  | BB748443    |
| 2.4545 | Pias4    | protein inhibitor of activated STAT 4                                 | NM_021501   |
| 2.4231 | Stch     | stress 70 protein chaperone, microsome-associated, human homolog      | AK021006    |
| 2.4216 | Ucp2     | uncoupling protein 2 (mitochondrial, proton carrier)                  | BC012697    |
| 2.4031 | Prkca    | Protein kinase C, alpha                                               | BB389420    |
| 2.3724 | Cxcl1    | chemokine (C-X-C motif) ligand 1                                      | BB554288    |
| 2.3684 | Tollip   | toll interacting protein                                              | BB400304    |
| 2.3556 | Slbp     | stem-loop binding protein                                             | AK016826    |
| 2.3443 | Casp8    | caspase 8                                                             | BC006737    |
| 2.2641 | Actb     | Actin, beta, cytoplasmic                                              | BG071386    |
| 2.2203 | Chrm1    | cholinergic receptor, muscarinic 1, CNS                               | BE947522    |
| 2.2116 | Glul     | glutamate-ammonia ligase (glutamine synthetase)                       | AI391218    |
| 2.2045 | Bdnf     | brain derived neurotrophic factor                                     | AY057913    |
| 2.2044 | Il6ra    | interleukin 6 receptor, alpha                                         | X53802      |
| 2.1902 | Prep     | prolyl endopeptidase                                                  | BM118423    |
| 2.1771 | MGC73635 | similar to histone 2a                                                 | W91024      |
| 2.1580 | Ck1f     | chemokine-like factor                                                 | AY047360    |
| 2.1301 | Hsf2     | heat shock factor 2                                                   | BB548474    |
| 2.1225 | Il1rap   | interleukin 1 receptor accessory protein                              | BE945253    |
| 2.1165 | Xdh      | xanthine dehydrogenase                                                | AV286265    |
| 2.0909 | Clic5    | chloride intracellular channel 5                                      | BB028501    |
| 2.0631 | Chrna3   | cholinergic receptor, nicotinic, alpha polypeptide 3                  | BB460687    |
| 2.0544 | Clcc1    | chloride channel CLIC-like 1                                          | BI412445    |
| 2.0351 | Racgap1  | Rac GTPase-activating protein 1                                       | NM_012025   |
| 2.0272 | Rpo1-3   | RNA polymerase 1-3                                                    | BC024394    |
| 2.0257 | Opr1     | opioid receptor-like 1                                                | X91813      |
| 2.0243 | Fcgr2b   | Fc receptor, IgG, low affinity IIb                                    | BM224327    |
| 2.0088 | Pparbp   | peroxisome proliferator activated receptor binding protein            | AV100992    |

| r      | Symbol | Description                                   | Genbank No. |
|--------|--------|-----------------------------------------------|-------------|
| 0.0430 | Car3   | carbonic anhydrase 3                          | NM_007606   |
| 0.1577 | H2-Eb1 | histocompatibility 2, class II antigen E beta | NM_010382   |
| 0.2431 | Adra1a | adrenergic receptor, alpha 1a                 | BB188444    |
| 0.2585 | Procr  | protein C receptor, endothelial               | NM_011171   |
| 0.2950 | Traf1  | Tnf receptor-associated factor 1              | BB218245    |

|        |          |                                                                       |           |
|--------|----------|-----------------------------------------------------------------------|-----------|
| 0.2967 | Prg4     | proteoglycan 4                                                        | NM_021400 |
| 0.2986 | Prlr     | prolactin receptor                                                    | BC005555  |
| 0.3100 | Crebbp   | CREB binding protein                                                  | AW060274  |
| 0.3289 | H2-Aa    | Histocompatibility 2, class II antigen A, alpha                       | AV018723  |
| 0.3383 | Creb1    | cAMP responsive element binding protein 1                             | AV016085  |
| 0.3397 | Egr2     | early growth response 2                                               | X06746    |
| 0.3423 | Cxcr4    | chemokine (C-X-C motif) receptor 4                                    | D87747    |
| 0.3471 | Egr2     | early growth response 2                                               | X06746    |
| 0.3525 | Tanc2    | Tetratricopeptide repeat, ankyrin repeat and coiled-coil containing 2 | BG076325  |
| 0.3547 | Prkar2b  | protein kinase, cAMP dependent regulatory, type II beta               | BI695530  |
| 0.3560 | Pltp     | phospholipid transfer protein                                         | AI591480  |
| 0.3578 | Nrp2     | neuropilin 2                                                          | BQ176723  |
| 0.3614 | Anxa1    | annexin A1                                                            | NM_010730 |
| 0.3640 | Hfe      | hemochromatosis                                                       | AJ306425  |
| 0.3748 | Crabp2   | cellular retinoic acid binding protein II                             | BC018397  |
| 0.4065 | Oprk1    | opioid receptor, kappa 1                                              | L11065    |
| 0.4089 | Lepr     | leptin receptor                                                       | BM124366  |
| 0.4114 | Prkca    | Protein kinase C, alpha                                               | BB114415  |
| 0.4152 | Cd44     | CD44 antigen                                                          | AW146109  |
| 0.4157 | Esr1     | estrogen receptor 1 (alpha)                                           | AI646838  |
| 0.4253 | Hdc      | histidine decarboxylase                                               | BG072171  |
| 0.4263 | Itgb1bp1 | Integrin beta 1 binding protein 1                                     | AI594688  |
| 0.4318 | Nrp2     | neuropilin 2                                                          | BB752129  |
| 0.4344 | Cd55     | CD55 antigen                                                          | NM_010016 |
| 0.4354 | Nt5e     | 5' nucleotidase, ecto                                                 | AV273591  |
| 0.4371 | Cmkor1   | chemokine orphan receptor 1                                           | BC015254  |
| 0.4438 | Igfbp2   | insulin-like growth factor binding protein 2                          | AK011784  |
| 0.4483 | Cd74     | CD74 antigen                                                          | BC003476  |
| 0.4490 | Fabp7    | fatty acid binding protein 7, brain                                   | NM_021272 |
| 0.4491 | H2-Aa    | Histocompatibility 2, class II antigen A, alpha                       | AV086906  |
| 0.4492 | Carf     | calcium response factor                                               | AF454947  |
| 0.4498 | Esr1     | estrogen receptor 1 (alpha)                                           | AI646838  |
| 0.4548 | Indo     | indoleamine-pyrrole 2,3 dioxygenase                                   | NM_008324 |
| 0.4600 | Pdcd4    | Programmed cell death 4                                               | BB732233  |
| 0.4602 | Hspa14   | heat shock protein 14                                                 | NM_015765 |
| 0.4625 | Cd80     | CD80 antigen                                                          | BQ175573  |
| 0.4647 | Acvr1l   | activin A receptor, type II-like 1                                    | BC014291  |
| 0.4695 | Ryk      | receptor-like tyrosine kinase                                         | M98547    |
| 0.4708 | Nupr1    | nuclear protein 1                                                     | NM_019738 |
| 0.4766 | Cnn2     | calponin 2                                                            | BI663014  |
| 0.4785 | Lamb2    | laminin, beta 2                                                       | BC026051  |
| 0.4786 | Vim      | vimentin                                                              | AV147875  |
| 0.4801 | Alcam    | Activated leukocyte cell adhesion molecule                            | AU041266  |
| 0.4805 | Col8a2   | procollagen, type VIII, alpha 2                                       | BG229308  |
| 0.4824 | Vim      | vimentin                                                              | AV147875  |
| 0.4831 | Lyzs     | lysozyme                                                              | AW208566  |
| 0.4851 | Ntsr1    | neurotensin receptor 1                                                | NM_018766 |
| 0.4874 | Marcks   | myristoylated alanine rich protein kinase C substrate                 | AW546141  |
| 0.4920 | Tnfsf13  | tumor necrosis factor (ligand) superfamily, member 13                 | NM_023517 |
| 0.4998 | Prlr     | prolactin receptor                                                    | AW554594  |

---



**Supplementary Table S2. The expression of cytokines and inflammation-related genes (LCM of whole PVN).**

| r      | Symbol  | Description                                                                 | Genbank No. |
|--------|---------|-----------------------------------------------------------------------------|-------------|
| 34.575 | Cxcl2   | chemokine (C-X-C motif) ligand 2                                            | NM_009140   |
| 7.8421 | Cxcl1   | chemokine (C-X-C motif) ligand 1                                            | NM_008176   |
| 5.1009 | Folh1   | folate hydrolase                                                            | NM_016770   |
| 4.4933 | Chrna4  | cholinergic receptor, nicotinic, alpha polypeptide 4                        | BB557207    |
| 4.0524 | Agtr1a  | angiotensin II receptor, type 1a                                            | AI551199    |
| 3.2851 | Cbs     | cystathionine beta-synthase                                                 | BC026595    |
| 3.1536 | Cxcl1   | chemokine (C-X-C motif) ligand 1                                            | BB554288    |
| 3.1147 | Ppgb    | Protective protein for beta-galactosidase                                   | AI481875    |
| 3.0831 | Plat    | plasminogen activator, tissue                                               | NM_008872   |
| 3.0219 | Lysmd4  | LysM, putative peptidoglycan-binding, domain containing 4                   | AV376944    |
| 3.0111 | Pgf     | placental growth factor                                                     | NM_008827   |
| 2.9261 | Ghitm   | Growth hormone inducible transmembrane protein                              | AI593417    |
| 2.8656 | Ucp2    | uncoupling protein 2                                                        | AW108044    |
| 2.8457 | Pglyrp1 | peptidoglycan recognition protein 1                                         | NM_009402   |
| 2.8113 | Pak3    | p21 (CDKN1A)-activated kinase 3                                             | BB468082    |
| 2.7859 | Wif1    | Wnt inhibitory factor 1                                                     | BC004048    |
| 2.7485 | Clptm1  | cleft lip and palate associated transmembrane protein 1                     | BB799287    |
| 2.7361 | Rarb    | retinoic acid receptor, beta                                                | BB266455    |
| 2.7325 | Efcbp1  | EF hand calcium binding protein 1                                           | BB667731    |
| 2.7260 | Ighmbp2 | immunoglobulin mu binding protein 2                                         | AW259474    |
| 2.7182 | Ccl25   | chemokine (C-C motif) ligand 25                                             | NM_009138   |
| 2.5873 | Ada     | adenosine deaminase                                                         | NM_007398   |
| 2.5537 | Chrna1  | cholinergic receptor, nicotinic, alpha polypeptide 1                        | NM_007389   |
| 2.5235 | Crbn    | cereblon                                                                    | AV156594    |
| 2.5185 | Hnrpab  | heterogeneous nuclear ribonucleoprotein A/B                                 | AK013709    |
| 2.5007 | Tac1    | tachykinin 1                                                                | NM_009311   |
| 2.4877 | Ddit4   | DNA-damage-inducible transcript 4                                           | AK017926    |
| 2.4859 | Adra1a  | adrenergic receptor, alpha 1a                                               | BB188444    |
| 2.4629 | Gss     | glutathione synthetase                                                      | NM_008180   |
| 2.4622 | Ucp2    | uncoupling protein 2                                                        | BC012697    |
| 2.4477 | Il6ra   | interleukin 6 receptor, alpha                                               | X53802      |
| 2.4465 | Cxcl3   | chemokine (C-X-C motif) ligand 3                                            | BB829808    |
| 2.4329 | Ctdspl2 | CTD small phosphatase like 2                                                | BG070878    |
| 2.4229 | Gabrg1  | gamma-aminobutyric acid (GABA-A) receptor, subunit gamma 1                  | AF156490    |
| 2.4222 | Scn1a   | sodium channel, voltage-gated, type I, alpha                                | BI731739    |
| 2.4154 | Mapk1   | mitogen activated protein kinase 1                                          | BM209765    |
| 2.4026 | Mtss1   | metastasis suppressor 1                                                     | BC024131    |
| 2.3981 | Nsf     | N-ethylmaleimide sensitive fusion protein                                   | BB400581    |
| 2.3755 | Mt1     | metallothionein 1                                                           | NM_013602   |
| 2.3610 | Grb2    | growth factor receptor bound protein 2                                      | BG064712    |
| 2.3416 | Vldlr   | very low density lipoprotein receptor                                       | BG063333    |
| 2.3173 | Cidea   | cell death-inducing DNA fragmentation factor, alpha subunit-like effector A | NM_007702   |
| 2.3143 | Txn1    | thioredoxin-like 1                                                          | BI416051    |
| 2.3067 | Edn3    | endothelin 3                                                                | BB535528    |
| 2.2983 | Ncor1   | Nuclear receptor co-repressor 1                                             | BM224192    |
| 2.2811 | Gad2    | glutamic acid decarboxylase 2                                               | AF326550    |
| 2.2730 | Ces3    | carboxylesterase 3                                                          | AI315015    |
| 2.2585 | Vldlr   | very low density lipoprotein receptor                                       | BE647363    |
| 2.2578 | Nts     | neurotensin                                                                 | NM_024435   |
| 2.2512 | Gmeb1   | glucocorticoid modulatory element binding protein 1                         | BB039426    |
| 2.2508 | Cd109   | CD109 antigen                                                               | AV246882    |
| 2.2467 | Pdgfd   | Platelet-derived growth factor, D polypeptide                               | BB428671    |
| 2.2275 | Cd24a   | CD24a antigen                                                               | NM_009846   |
| 2.2128 | Amigo2  | adhesion molecule with Ig like domain 2                                     | AV315087    |
| 2.2091 | Scg2    | secretogranin II                                                            | NM_009129   |
| 2.1913 | Actb    | Actin, beta, cytoplasmic                                                    | BG071386    |



|        |          |                                                            |           |
|--------|----------|------------------------------------------------------------|-----------|
| 2.1908 | Vip      | vasoactive intestinal polypeptide                          | AK018599  |
| 2.1823 | Pcsk1    | proprotein convertase subtilisin/kexin type 1              | M69196    |
| 2.1798 | Mt2      | metallothionein 2                                          | AA796766  |
| 2.1756 | Efnb2    | ephrin B2                                                  | U30244    |
| 2.1707 | Sgk      | serum/glucocorticoid regulated kinase                      | NM_011361 |
| 2.1643 | Ern1     | Endoplasmic reticulum (ER) to nucleus signalling 1         | BG075179  |
| 2.1604 | Stxbp1   | syntaxin binding protein 1                                 | AF326545  |
| 2.1571 | Mtf2     | metal response element binding transcription factor 2      | BG066919  |
| 2.1559 | Hnrpu    | heterogeneous nuclear ribonucleoprotein U                  | BF228203  |
| 2.1431 | Isl1     | ISL1 transcription factor, LIM/homeodomain                 | BQ176915  |
| 2.1391 | Frk      | fyn-related kinase                                         | BB831042  |
| 2.1260 | Hspa4    | heat shock protein 4                                       | BE912771  |
| 2.1217 | Cacna2d1 | calcium channel, voltage-dependent, alpha2/delta subunit 1 | U73483    |
| 2.1213 | Kctd20   | potassium channel tetramerisation domain containing 20     | AV281062  |
| 2.1080 | Snrpa1   | small nuclear ribonucleoprotein polypeptide A'             | BC013777  |
| 2.1009 | Cntn3    | contactin 3                                                | NM_008779 |
| 2.0999 | Ptpn12   | Protein tyrosine phosphatase, non-receptor type 12         | BB255893  |
| 2.0978 | Ctgf     | connective tissue growth factor                            | NM_010217 |
| 2.0768 | Mmd      | monocyte to macrophage differentiation-associated          | AA472735  |
| 2.0768 | Zhx1     | zinc fingers and homeoboxes protein 1                      | NM_009572 |
| 2.0767 | Glg1     | golgi apparatus protein 1                                  | BB795216  |
| 2.0462 | Cp       | ceruloplasmin                                              | BB332449  |
| 2.0454 | Socs3    | suppressor of cytokine signaling 3                         | BB241535  |
| 2.0189 | Penk1    | preproenkephalin 1                                         | M13227    |
| 2.0152 | Ctns     | Cystinosis, nephropathic                                   | BB430980  |
| 2.0147 | Agrin    | agrin                                                      | BM208224  |
| 2.0095 | Ddc      | dopa decarboxylase                                         | AF071068  |
| 2.0034 | Jazf1    | JAZF zinc finger 1                                         | BB755745  |

| r      | Symbol | Description                                     | Genbank No. |
|--------|--------|-------------------------------------------------|-------------|
| 0.1738 | Vamp3  | vesicle-associated membrane protein 3           | BB491065    |
| 0.2913 | Egr2   | early growth response 2                         | X06746      |
| 0.3020 | Egr2   | early growth response 2                         | X06746      |
| 0.3021 | Flt1   | FMS-like tyrosine kinase 1                      | NM_010228   |
| 0.3195 | Nrip2  | nuclear receptor interacting protein 2          | AW491344    |
| 0.3297 | Dusp8  | dual specificity phosphatase 8                  | NM_008748   |
| 0.3427 | Grip1  | Glutamate receptor interacting protein 1        | BB531021    |
| 0.3524 | Grip1  | Glutamate receptor interacting protein 1        | BM218868    |
| 0.3602 | Prkce  | Protein kinase C, epsilon                       | BB534545    |
| 0.3641 | Ptprg  | Protein tyrosine phosphatase, receptor type, G  | BB435965    |
| 0.3657 | Fos    | FBJ osteosarcoma oncogene                       | AV026617    |
| 0.3673 | Per3   | period homolog 3                                | AW553065    |
| 0.3684 | Hspa4  | heat shock protein 4                            | AW909503    |
| 0.3733 | Itch   | itchy                                           | AK020167    |
| 0.3835 | Calu   | calumenin                                       | BB120190    |
| 0.3861 | Zfp53  | zinc finger protein 53                          | BB176857    |
| 0.3985 | Thbs2  | thrombospondin 2                                | BB233297    |
| 0.3986 | Adcy3  | adenylate cyclase 3                             | BB763890    |
| 0.4007 | H2-Aa  | Histocompatibility 2, class II antigen A, alpha | AV018723    |
| 0.4147 | Ncam2  | neural cell adhesion molecule 2                 | AF001287    |
| 0.4161 | Cd82   | CD82 antigen                                    | NM_007656   |
| 0.4209 | Kit    | kit oncogene                                    | BB333334    |
| 0.4212 | Nrip1  | nuclear receptor interacting protein 1          | BB041915    |
| 0.4216 | Pam    | Peptidylglycine alpha-amidating monooxygenase   | BM242340    |
| 0.4239 | Egr3   | early growth response 3                         | AV346607    |
| 0.4387 | Cxcl12 | chemokine (C-X-C motif) ligand 12               | NM_013655   |
| 0.4407 | Ireb2  | Iron responsive element binding protein 2       | BM201500    |

|        |         |                                                            |           |
|--------|---------|------------------------------------------------------------|-----------|
| 0.4498 | Slit2   | slit homolog 2                                             | BB547877  |
| 0.4551 | Qser1   | glutamine and serine rich 1                                | BC021511  |
| 0.4563 | Grip1   | Glutamate receptor interacting protein 1                   | BB337104  |
| 0.4566 | Lbh     | limb-bud and heart                                         | AK007400  |
| 0.4578 | Thbd    | thrombomodulin                                             | NM_009378 |
| 0.4598 | Zar1    | zygote arrest 1                                            | BG071693  |
| 0.4634 | Npas3   | neuronal PAS domain protein 3                              | AV226749  |
| 0.4659 | Runx1t1 | runt-related transcription factor 1; translocated to, 1    | AV327778  |
| 0.4726 | Calm3   | calmodulin 3                                               | AV047570  |
| 0.4753 | Pam     | Peptidylglycine alpha-amidating monooxygenase              | BI499978  |
| 0.4765 | Tcf7l2  | transcription factor 7-like 2, T-cell specific, HMG-box    | BB175494  |
| 0.4819 | Thada   | thyroid adenoma associated                                 | BG064135  |
| 0.4846 | Fap     | fibroblast activation protein                              | NM_007986 |
| 0.4853 | Slit2   | Slit homolog 2                                             | BB527337  |
| 0.4857 | Nrxn1   | neurexin I                                                 | BB130571  |
| 0.4866 | Tff1    | trefoil factor 1                                           | NM_009362 |
| 0.4869 | Scpep1  | serine carboxypeptidase 1                                  | AV102733  |
| 0.4932 | Ptprd   | Protein tyrosine phosphatase, receptor type, D             | BB477150  |
| 0.4941 | Pdgfc   | platelet-derived growth factor, C polypeptide              | NM_019971 |
| 0.4942 | Hspa8   | heat shock protein 8                                       | AK004608  |
| 0.4944 | Fgfr4   | fibroblast growth factor receptor 4                        | AF127140  |
| 0.4973 | Pparbp  | peroxisome proliferator activated receptor binding protein | AV100992  |
| 0.4993 | Dlc1    | deleted in liver cancer 1                                  | BB768194  |
| 0.4996 | Tert    | telomerase reverse transcriptase                           | BB400861  |

---

**Supplementary Table S3. Primers for BDNF variants.**

| Exon | Forward primers sequences | Hydrolysis primers sequences | Reverse primers sequences      | Annealing Temp. (°C) |
|------|---------------------------|------------------------------|--------------------------------|----------------------|
| 1    | CACATTACCTTCCTGCATCTGTTG  | AAGCCACAATGTTCCACCAG         | ACCATAGTAAGGAAAAGGATGGTCAT     | 64                   |
| 2a   | CCATTCAGCACCTTGGACAGA     | AGTACTTCATCCAGTTCACCAG       | CGAAGTATGAAATAACCATAGTAAGGAAAA | 60                   |
| 2b   | AGTTGGCTTCCTAGCGGTGTAG    | AAGCTCCGGTTCACCAG            | CGAAGTATGAAATAACCATAGTAAGGAAAA | 58                   |
| 2c   | TTGGGAAATGCAAGTGTTTATCA   | CCGCAAAGAAGTTCACCAG          | CGAAGTATGAAATAACCATAGTAAGGAAAA | 58                   |
| 3    | CCGGGCCGGATGCT            | TTGAGCCCAGTTCACCAG           | ACCATAGTAAGGAAAAGGATGGTCAT     | 58                   |
| 4    | CTGCCTTGATGTTTACTTTGACAAG | TGACTGAAAAAGTTCACCAGG        | ACCATAGTAAGGAAAAGGATGGTCAT     | 60                   |
| 5    | CAGAAGCGTGACAACAATGTGA    | ACCCTGAGTTCACCAGG            | ACCATAGTAAGGAAAAGGATGGTCAT     | 60                   |
| 6a   | TCCTGAGGAAGTAAAAGTTTGGACT | TCATCCGGGATTCCACCAG          | ACCATAGTAAGGAAAAGGATGGTCAT     | 60                   |
| 6b   | CCGAACAACTGATTGCTGAAA     | TGGTGTGTAAGTTCACCAG          | ACCATAGTAAGGAAAAGGATGGTCAT     | 60                   |

**Supplementary Table S4. Antibodies.**

| Antigen      | Antibody          | Dilution | Source                              |
|--------------|-------------------|----------|-------------------------------------|
| Lectin RCA-1 | Biotinylated      | 1:200    | Vector Laboratories                 |
| Iba1         | rabbit polyclonal | 1:200    | Wako Pure Chemical Industries, Ltd. |
| Mac-1        | rat purified      | 1:200    | BD Pharmingen                       |
| GFAP         | goat polyclonal   | 1:500    | Santa Cruz Biotechnology            |
| NeuN         | mouse monoclonal  | 1:500    | Chemicon                            |
| IL-6         | goat polyclonal   | 1:1000   | Santa Cruz Biotechnology            |
| IL-1 $\beta$ | goat polyclonal   | 1:1000   | Santa Cruz Biotechnology            |
| TGF $\beta$  | goat polyclonal   | 1:1000   | Santa Cruz Biotechnology            |
| TNF $\alpha$ | goat polyclonal   | 1:1000   | Santa Cruz Biotechnology            |
| MHC-II       | goat polyclonal   | 1:1000   | Santa Cruz Biotechnology            |
| BDNF         | rabbit polyclonal | 1:1000   | Santa Cruz Biotechnology            |
|              | rabbit polyclonal | 1:1000   | abcam                               |
|              | sheep polyclonal  | 1:1000   | abcam                               |
| CRH          | rabbit polyclonal | 1:500    | Yanaihara Institute Inc.            |
| UCN1         | rabbit polyclonal | 1:500    | Yanaihara Institute Inc.            |
| UCN2         | rabbit polyclonal | 1:500    | Yanaihara Institute Inc.            |
| UCN3         | rabbit polyclonal | 1:500    | Yanaihara Institute Inc.            |
| AVP          | rabbit polyclonal | 1:500    | AbD Serotec                         |
| OXT          | rabbit polyclonal | 1:1000   | LifeSpan BioScience                 |
| TRH          | rabbit polyclonal | 1:200    | Acris Antibodies GmbH               |
